# Supplementary material for: Effects of Echo Time on IVIM Quantification of the Normal Prostate
Source: PubMed Central journal article supplement (PMC5803195; doi:10.1038/s41598-018-19150-2), 2018-02-07
Supplement: 41598_2018_19150_MOESM1_ESM.pdf [file 41598_2018_19150_MOESM1_ESM.pdf]

## Effects of Echo Time on IVIM Quantification of the Normal Prostate

Zhaoyan Feng<sup>1#</sup>, Xiangde Min<sup>1#</sup>, Liang Wang<sup>1\*</sup>, Xu Yan<sup>2</sup>, Basen Li<sup>1</sup>, Zan Ke<sup>1</sup>, Peipei Zhang<sup>1</sup>, Huijuan You<sup>1</sup>

<sup>1</sup> Department of Radiology, Tongji Hospital, Tongji Medical College, Huazhong University of Science and Technology, Wuhan, Hubei, China.

<sup>2</sup>MR Collaboration NE Asia, Siemens Healthcare, Shanghai, China

<sup>#</sup>These authors contributed equally to this work.

\*Corresponding author

E-mail: wang6@tjh.tjmu.edu.cn

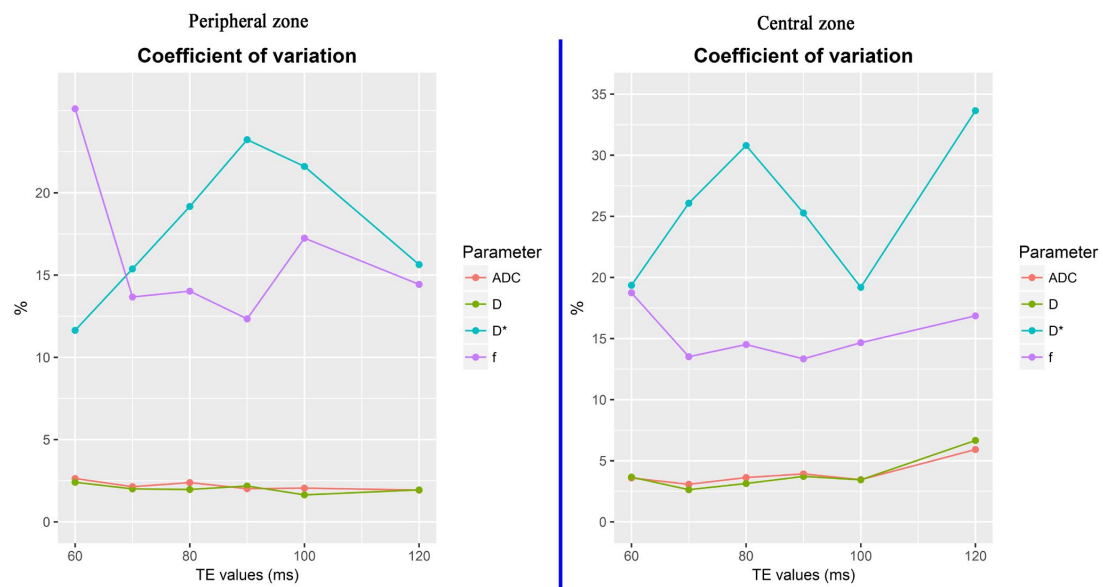

**Figure S1. Mean coefficient of variation (CV, in %) for the ADC, D, D\* and f from ROI analysis of 17 healthy volunteers in the peripheral zone and central zone. With TE values in the range of 60-120 ms, the CV of the ADC, D, D\* and f**

values in the peripheral zone were in the range of 1.928%-2.635%, 1.641%-2.407%, 11.640%-23.230%, 12.337%-25.108%; the CV of the ADC, D, D\* and f values in the central zone were in the range of 3.070%-5.918%, 2.632%-6.661%, 19.189%-33.644%, 13.338%-18.741%.

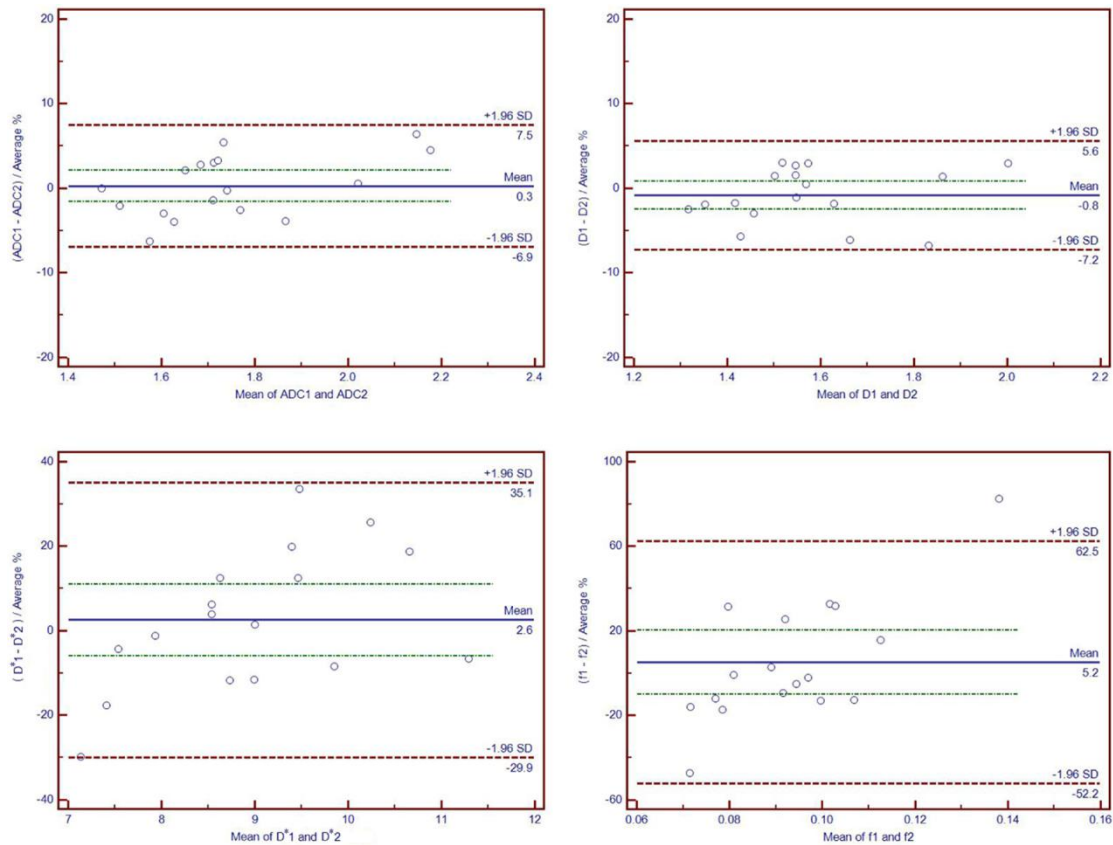

**Figure S2. Bland-Altman plots of reproducibility of ADC, D, D\* and f for the prostate peripheral zone.** Bland-Altman plots of mean of differences of ADC, D, D\* and f (Y-axis) against mean ADC, D, D\* and f (X-axis) of the first and second DWI series examination (TE = 60 ms), with mean difference (blue dashed line) and 95% confidence interval of the mean difference (limits of agreement) (red dashed lines). The data unit of the X-axis is  $10^{-3} \text{ mm}^2/\text{s}$  for ADC, D, and D\*; f has no units.

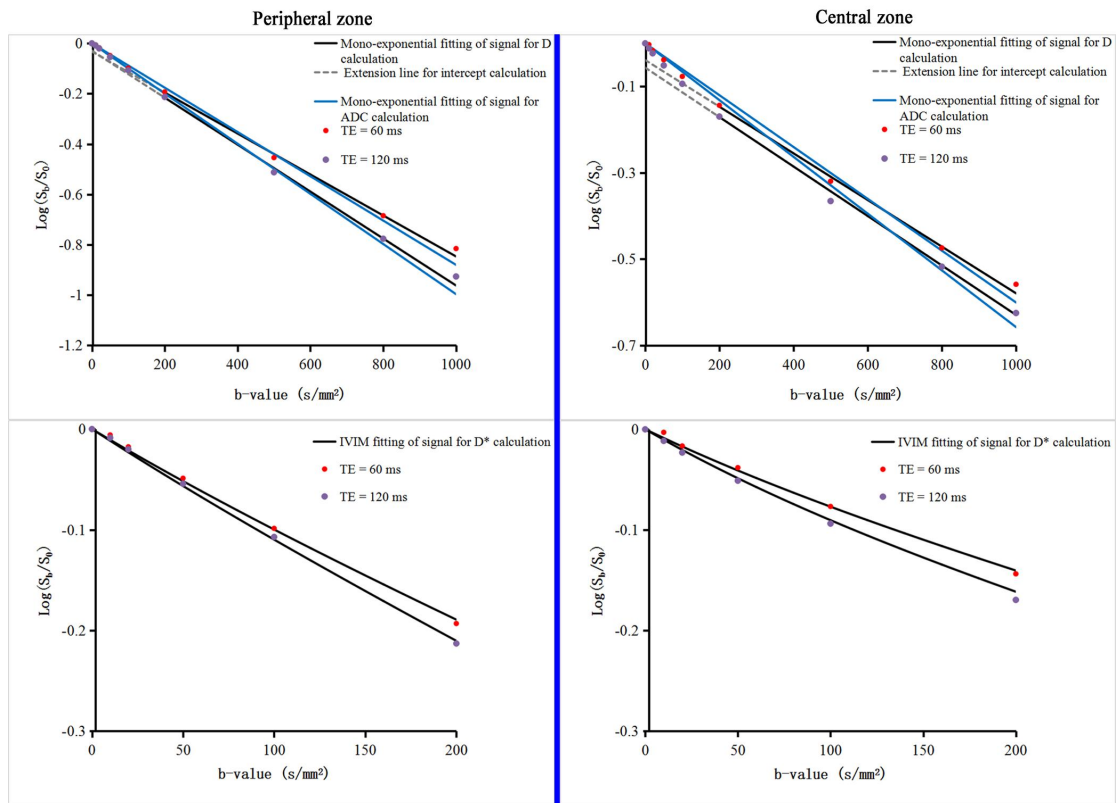

**Figure S3. The measured DWI signals and fitting curves of the normal prostate.**

The ADC was calculated from all the b values (0-1000 s/mm<sup>2</sup>) using the mono-exponential equation  $S_b = S_0 \times \exp(-b \times \text{ADC})$ . The diffusion coefficient (D) and  $S_0'$  were calculated using the mono-exponential equation  $S_b = S_0' \exp(-b \times D)$ .  $S_b$  is the signal intensity with the gradient, and  $S_0'$  is the b=0 intercept of the mono-exponential fit of high b value data ( $\geq 200$  s/mm<sup>2</sup>). The perfusion fraction (f) was calculated by  $f = (1 - S_0')/S_0$ . At last, the calculated D and f were applied in the IVIM equation fit of all b values (0-200 s/mm<sup>2</sup>) to measure D\*. The ADC, D, D\* and f were  $2.027 \times 10^{-3}$  mm<sup>2</sup>/s,  $1.875 \times 10^{-3}$  mm<sup>2</sup>/s,  $10.334 \times 10^{-3}$  mm<sup>2</sup>/s, 0.072 (TE =60 ms);  $2.295 \times 10^{-3}$  mm<sup>2</sup>/s,  $2.148 \times 10^{-3}$  mm<sup>2</sup>/s,  $10.656 \times 10^{-3}$  mm<sup>2</sup>/s, 0.065 (TE=120 ms) in the peripheral zone. The ADC, D, D\* and f were  $1.383 \times 10^{-3}$  mm<sup>2</sup>/s,  $1.245 \times 10^{-3}$  mm<sup>2</sup>/s,  $10.473 \times 10^{-3}$  mm<sup>2</sup>/s, 0.085 (TE=60 ms);  $1.514 \times 10^{-3}$  mm<sup>2</sup>/s,  $1.320 \times 10^{-3}$  mm<sup>2</sup>/s,  $10.566 \times 10^{-3}$  mm<sup>2</sup>/s, 0.121 (TE=120 ms) in the central zone.
